# Supplementary material for: Study on the Effects of Wettability and Pressure in Shale Matrix Nanopores Imbibition during Shut-in Process by Molecular Dynamics Simulations
Source: Preprints.org preprint supplement (doi:10.20944/preprints202401.0576.v1), 2024-01-08
Supplement: Supplementary file 1 [file supplementary]

**Study on the Effects of Wettability and Pressure in Shale Matrix Nanopores Imbibition during Shut-in Process by Molecular Dynamics Simulations**

**Wen Jiang 1,2,4, Weifeng Lv 2,3,4* , and Ninghong Jia 3,4, Xiaoqing Lu 5, Lu Wang 5, Kai Wang 1,2,4, and Yuhao Mei 1,2,4.**

1 College of Engineering Science, University of Chinese Academy of Sciences, Beijing

100049

2 Institute of Porous Flow and Fluid Mechanics, University of Chinese Academy of

Sciences, Langfang 065007, China; e-mail@e-mail.com

3 State Key Laboratory of Enhanced Oil and Gas Recovery, Beijing 100083, China

4 Research Institute of Petroleum Exploration & Development, PetroChina, Beijing 100083, China

5 School of Materials Science and Engineering, China University of Petroleum, Qingdao,

266580, China.

***** Correspondence: lweifeng@petrochina.com.cn

**CONTENTS**

[**Figure S1.** 1](#_Toc155365810)

[**Figure S2.** 2](#_Toc155365811)

[**Figure S3.** 2](#_Toc155365812)

[**Figure S4.** 3](#_Toc155365813)

[**Figure S5.** 3](#_Toc155365814)

[**Figure S6.** 4](#_Toc155365815)

[**Table S1.** 5](#_Toc155365816)

[**Table S2.** 5](#_Toc155365817)

[**References** 5](#_Toc155365818)

**Figure S1.**

The interaction energy[1] between oil and wall during structural optimization of the oil-pore systems of imbibition systems I and II.


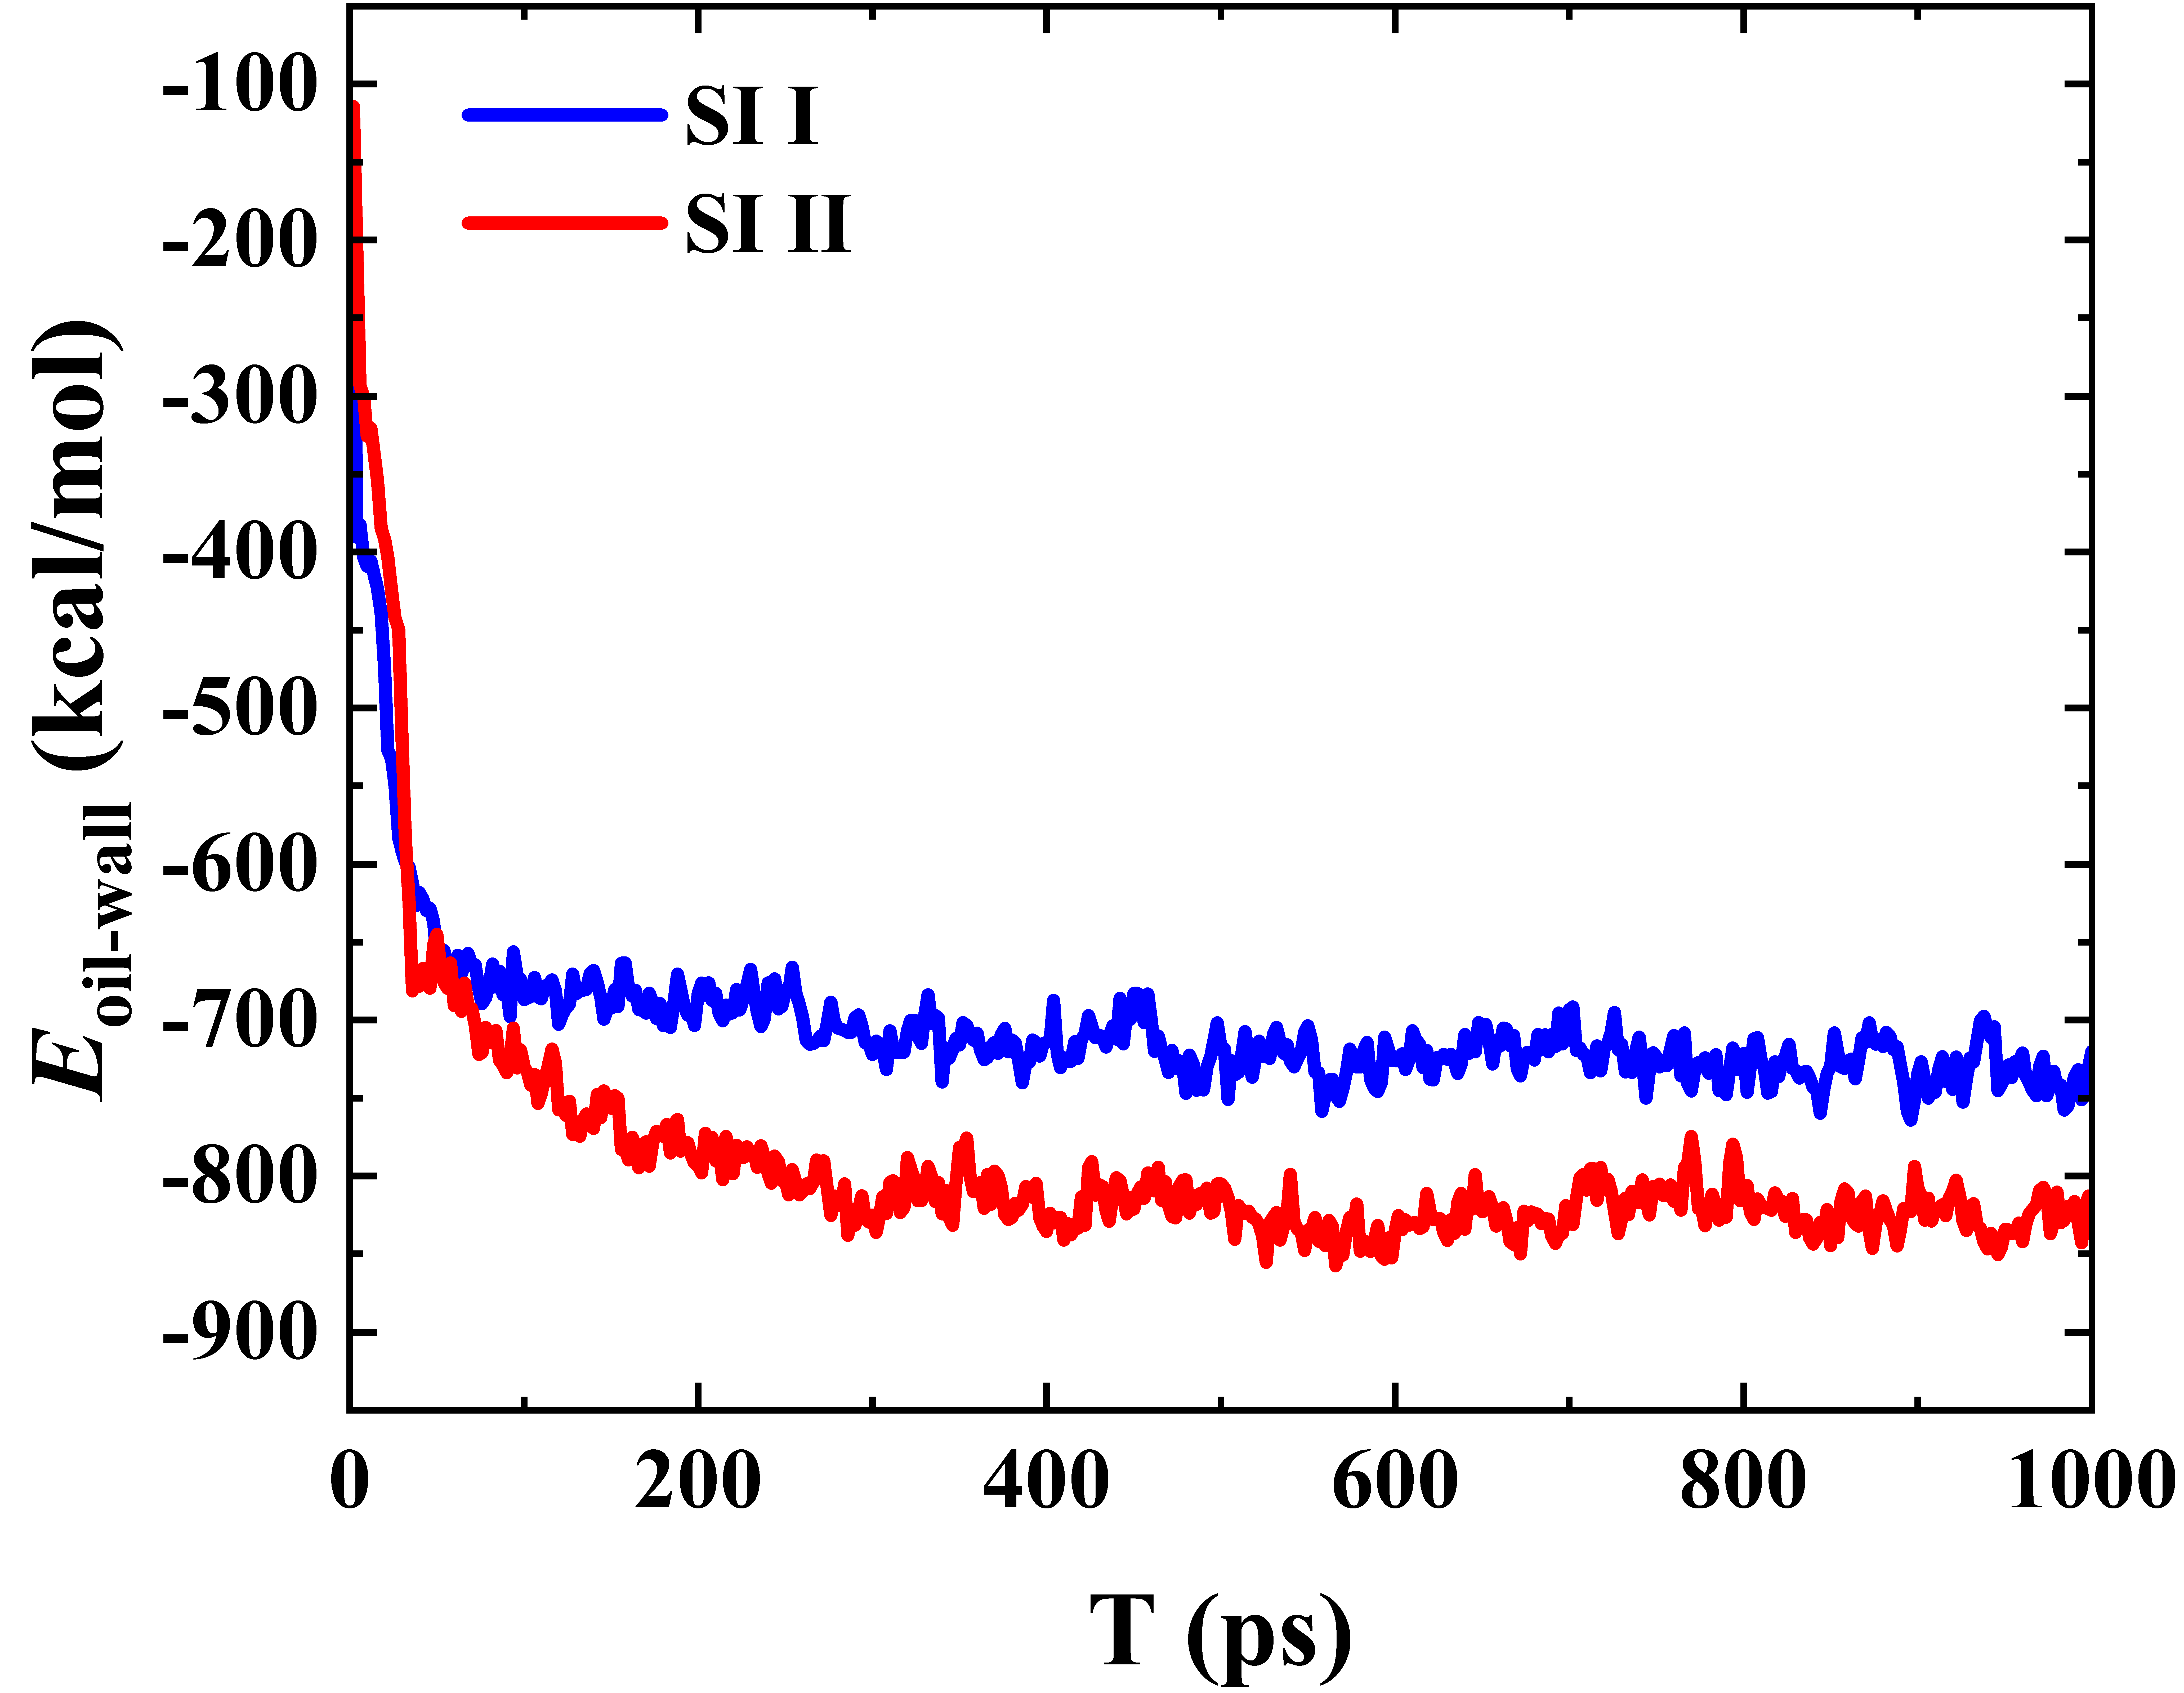


**Figure S2.**

(a) The interaction energy between water molecules and wall, and (b) hydrogen bond number as a function of time *T* in spontaneous imbibition systems I-II respectively.


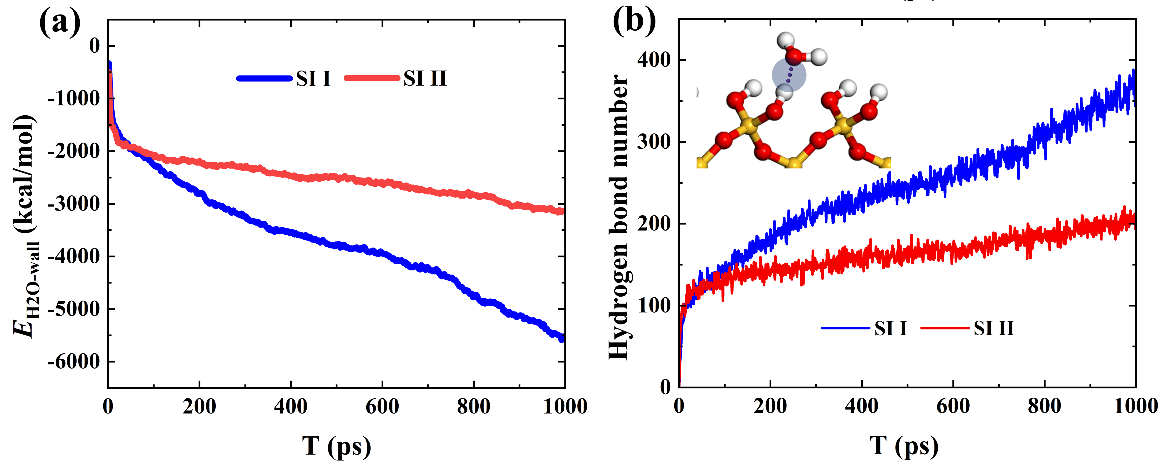


**Figure S3.**

Molecular model for calculating the interfacial tension of pure oil and water systems.
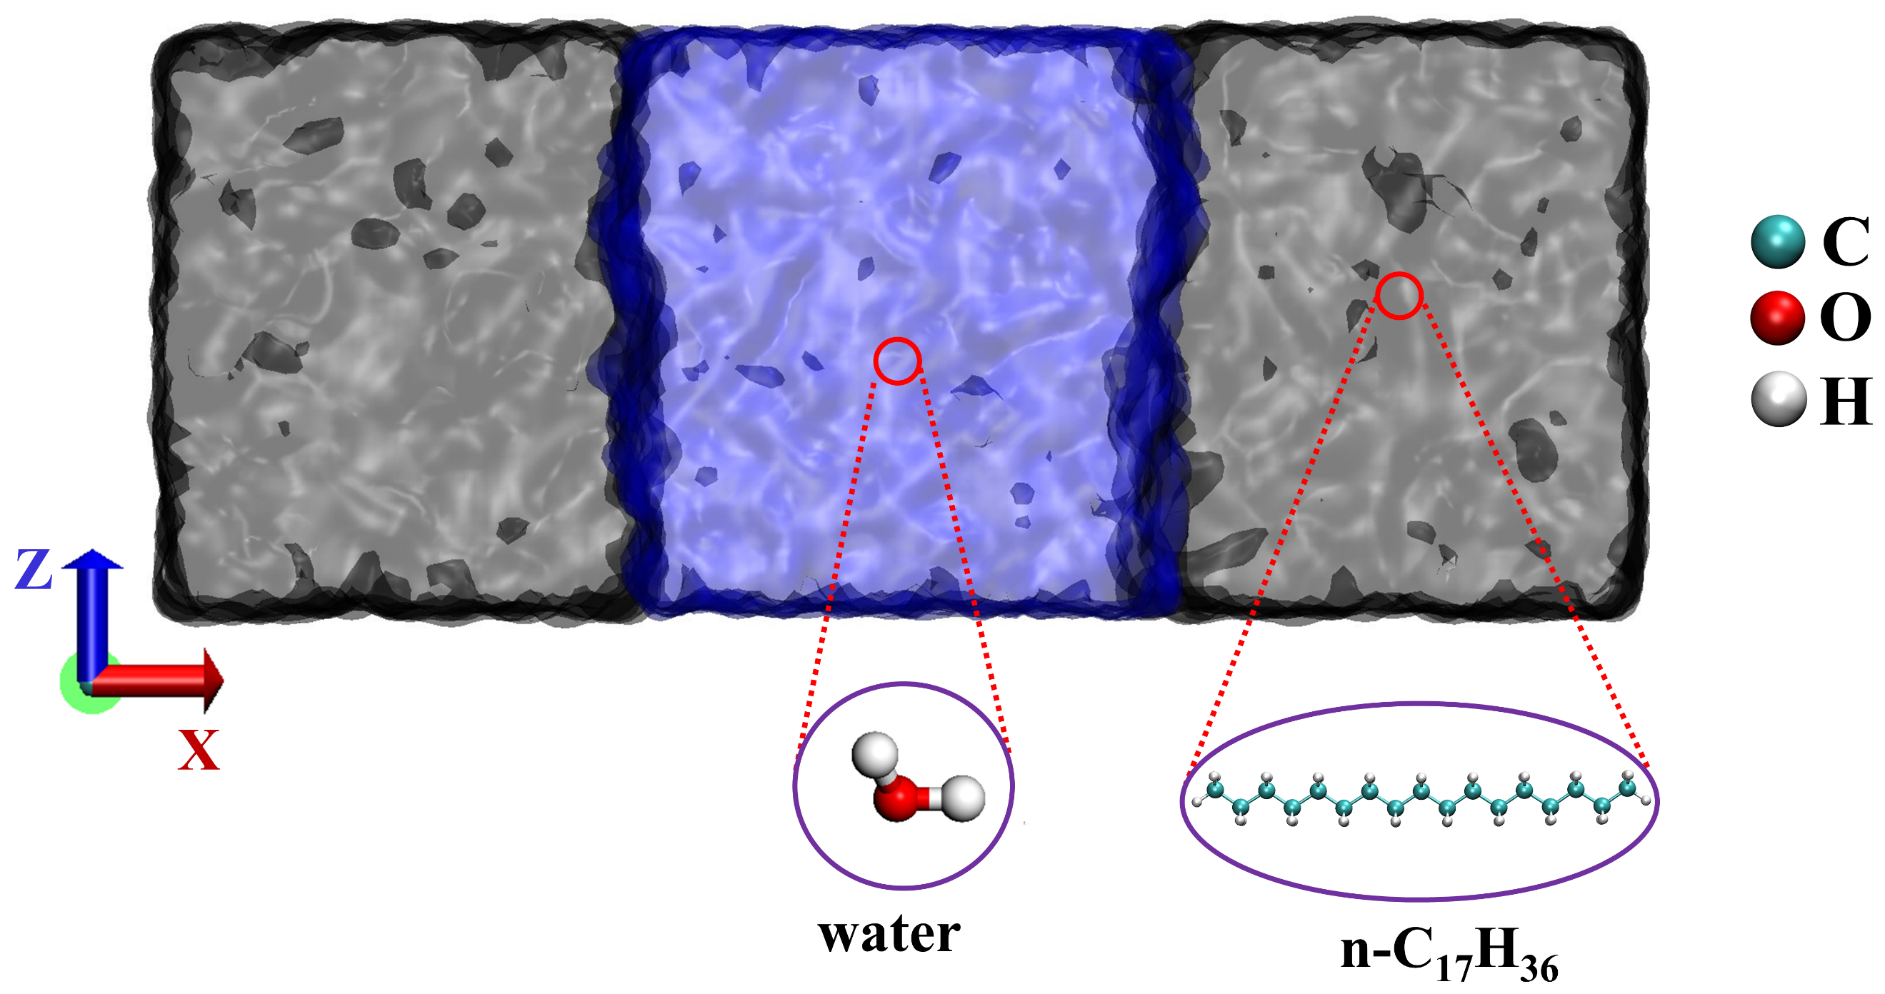


The oil-water interfacial tension is calculated by：

where *L*X is the X-direction length of the simulation box, and 〈Pαα〉 (α =x,y,z) is the diagonal element of the pressure tensor, which is averaged over position and time.

**Figure S4.**

Quartz wall sizes and different modified wall surfaces with different wettability.


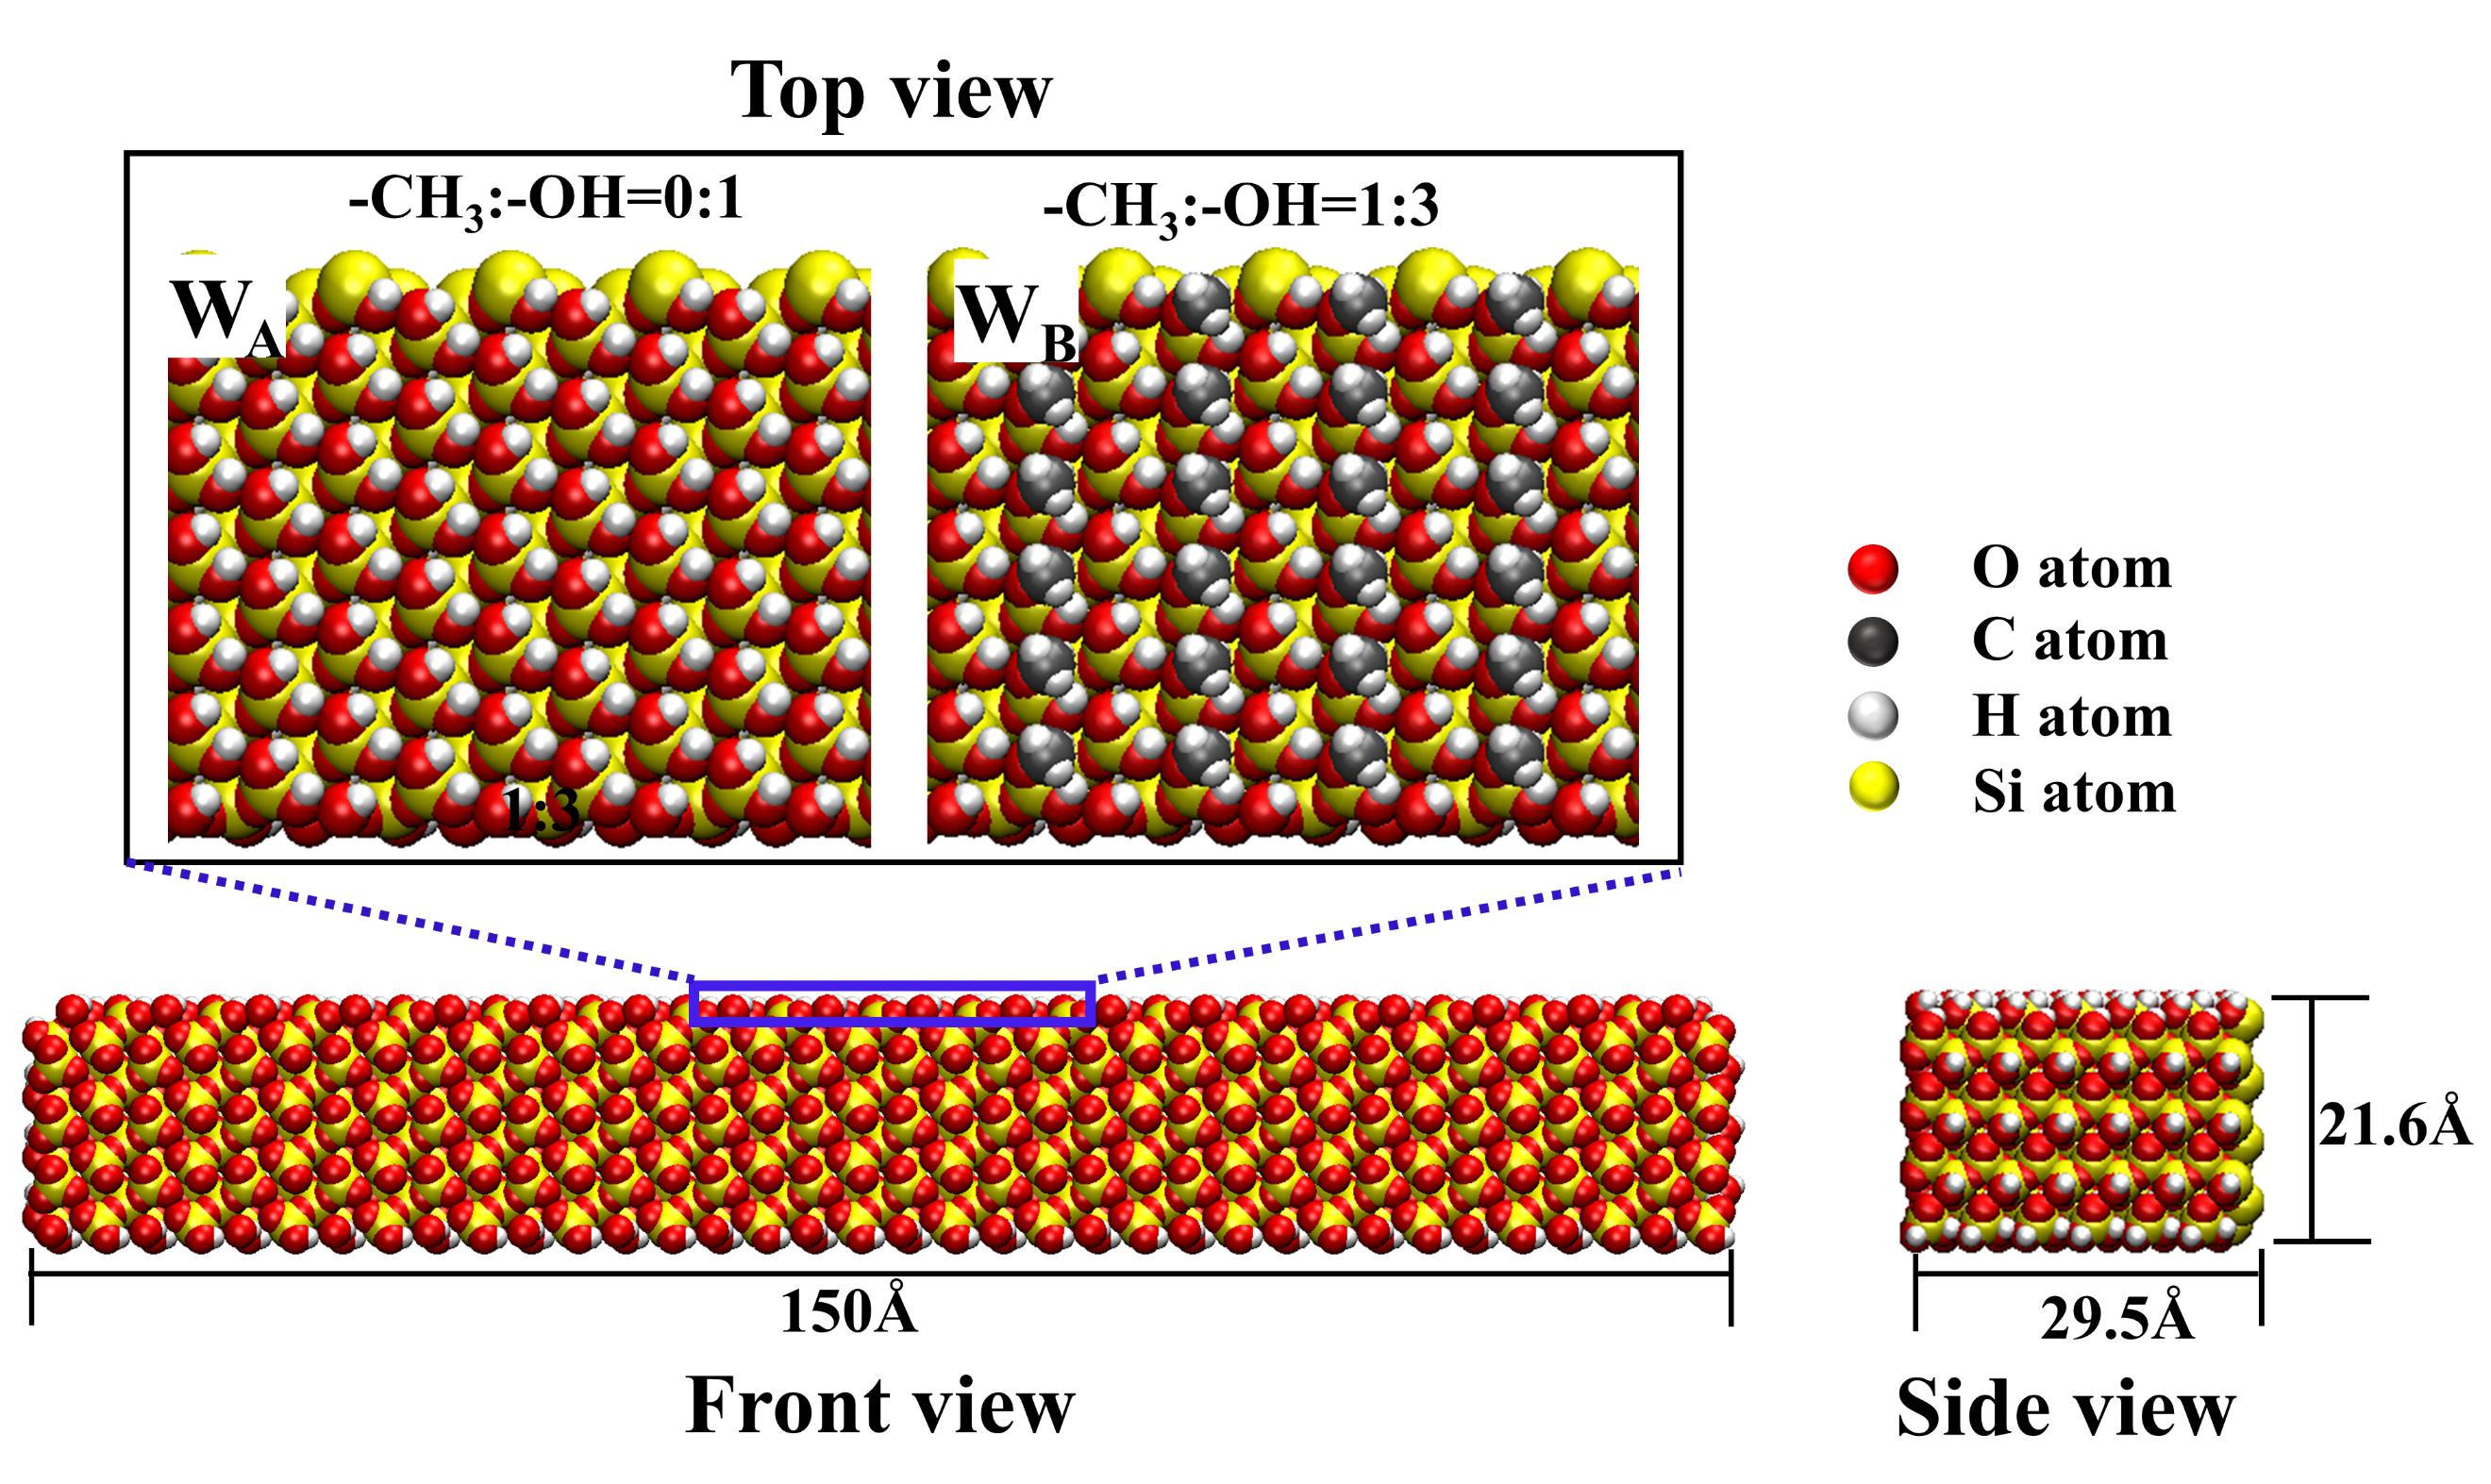


**Figure S5.**

(a,b) Initial and equilibrium configuration for static contact angle testing respectively. (c) Schematic diagram of static contact angle calculation method. (d) Static wetting angle of WA and WB.


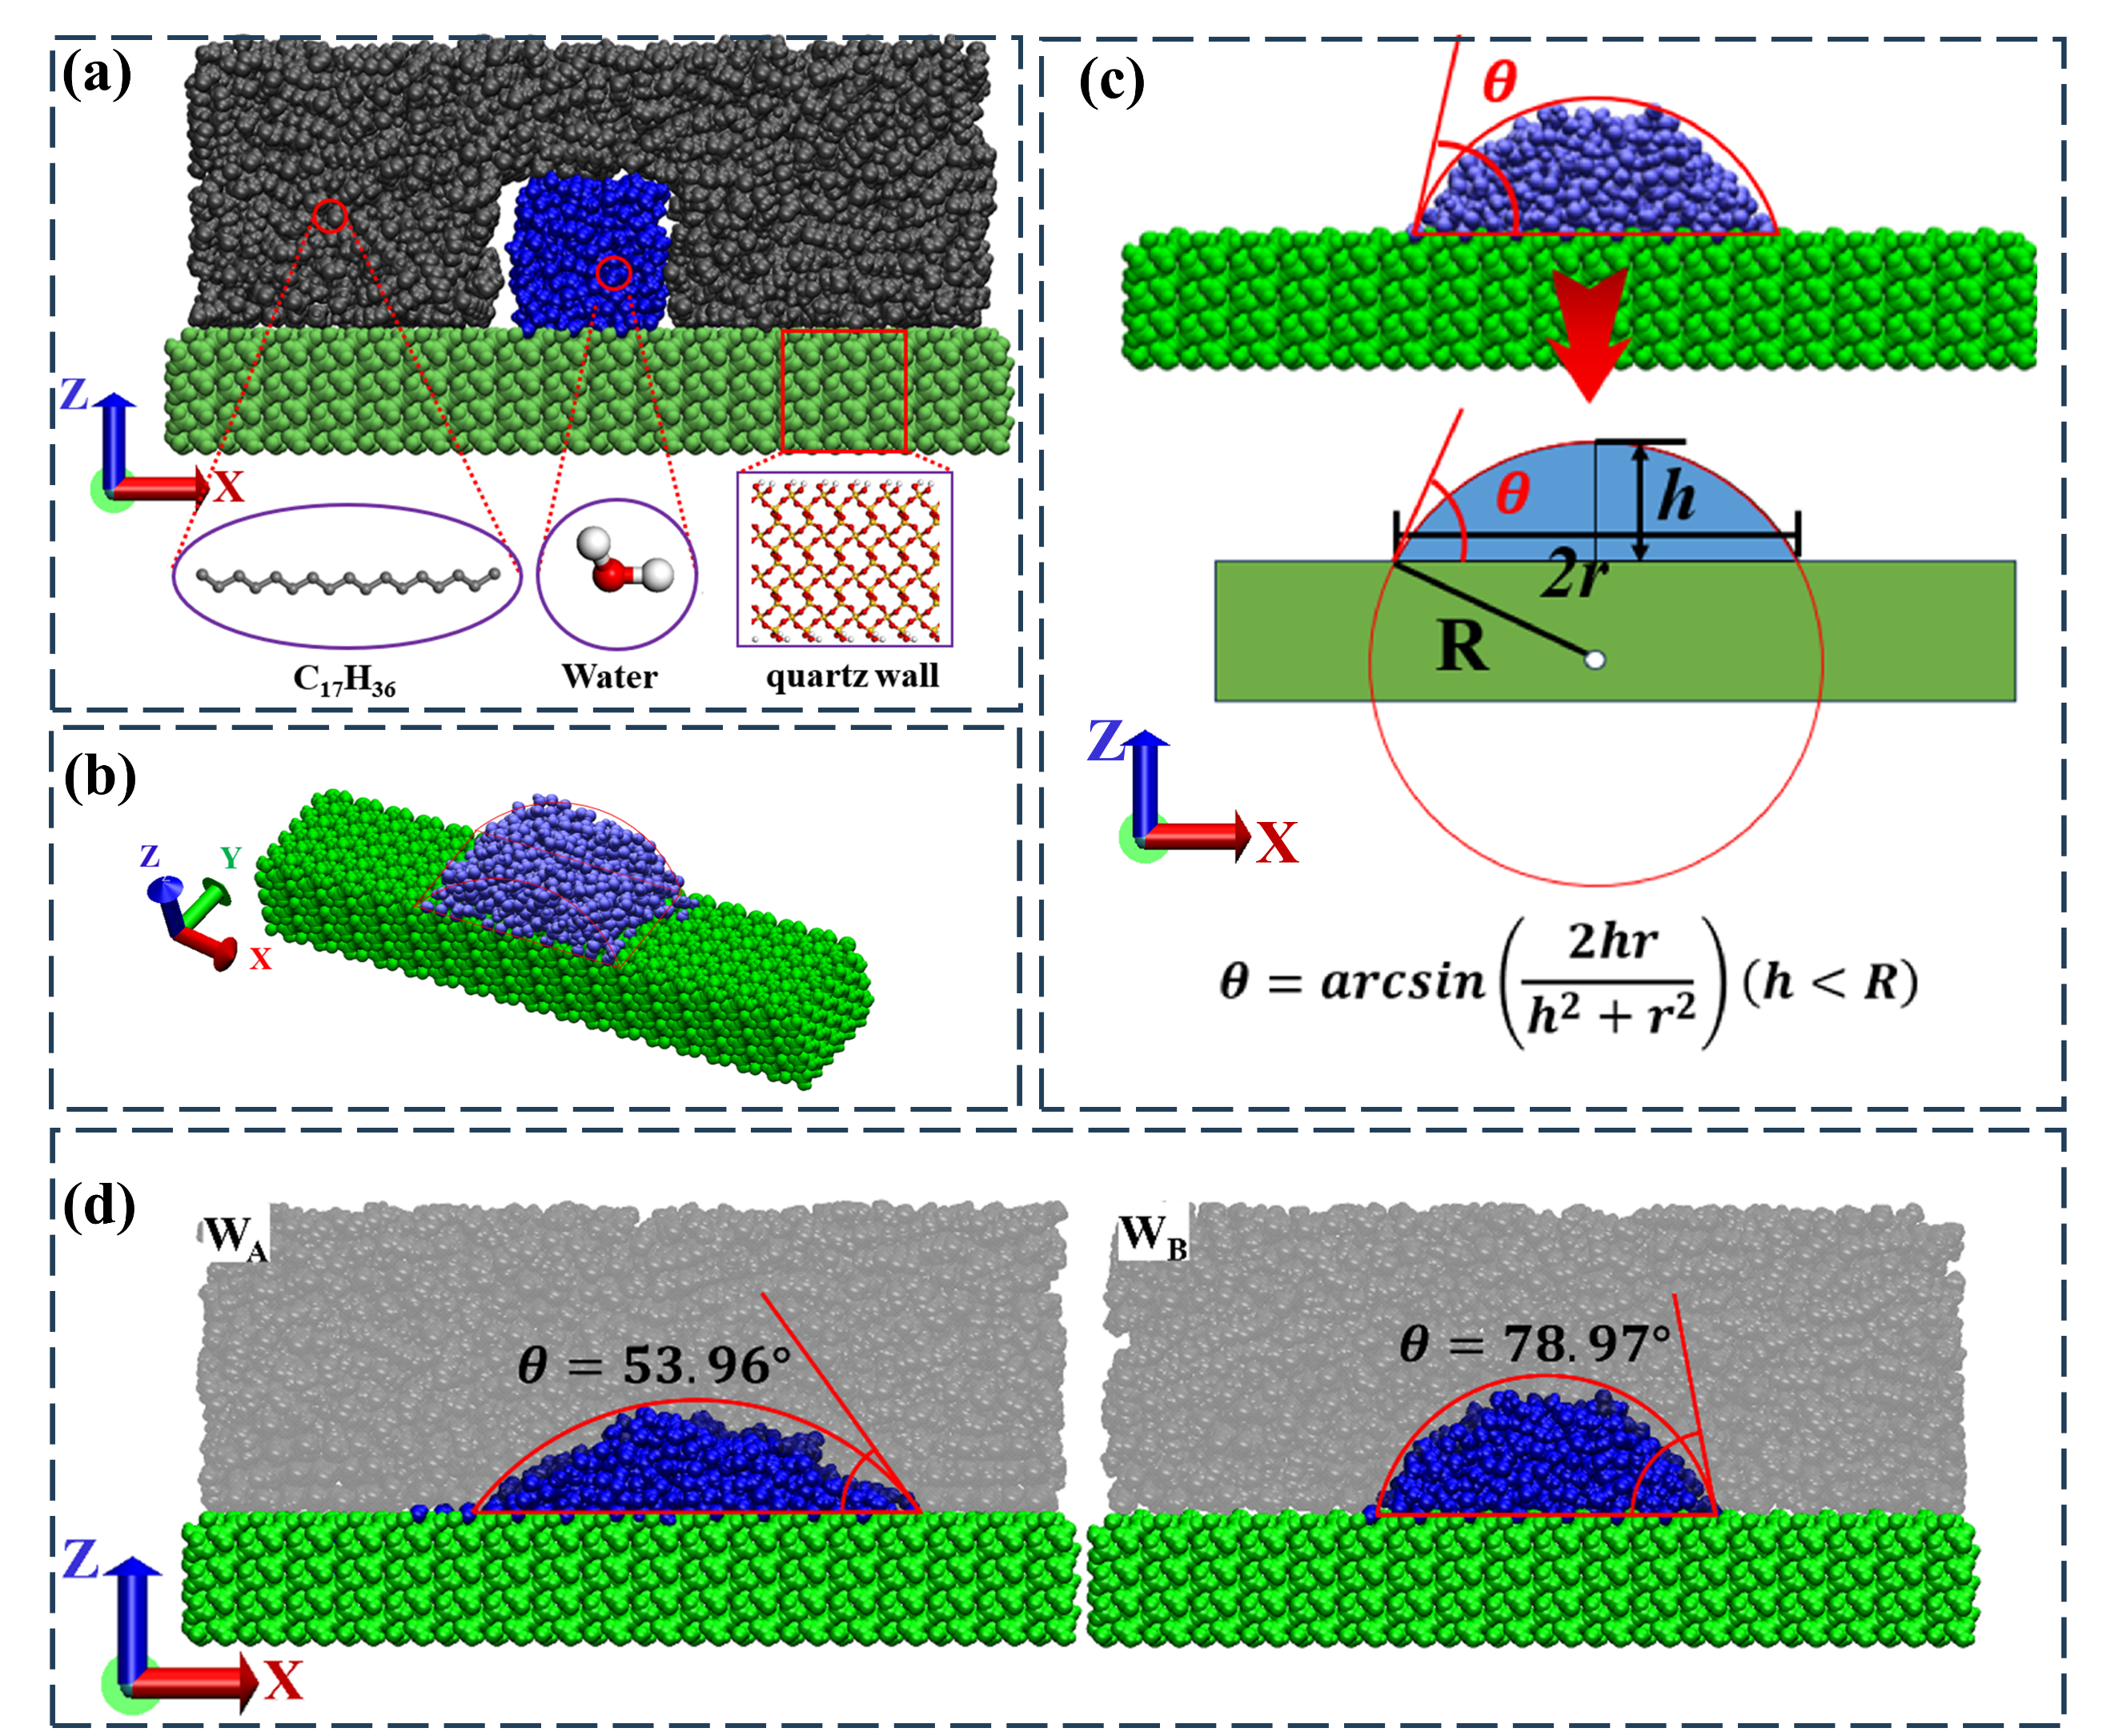


In this work, the static contact angle of the oil-water-quartz wall three-phase system is measured to characterize the different wettability of two modified quartz walls (WA and WB). The molecular model for measuring static contact angle is shown in Figure S5a. To ensure the stability and accuracy of the results, referring to the data in Figure S6, shale oil composed of a single component n-C17H36 was selected as the wetting external phase, and water clusters were selected as the wetting internal phase. Since the molecular diameter of water molecules is smaller than that of oil molecules, and the edges of water droplets are more “smooth” than the edges of oil droplets, this article adopts the “oil-water droplet-mineral wetting model” that is beneficial to the observation and calculation of contact angles. When using "cube-shaped water clusters" for the wetting model, water spreads in a cylindrical shape on the wall surface, which can eliminate the influence of the three-phase contact line tension on the contact angle. After performing 2ns EMD on this molecular model under reservoir conditions, the stable adsorption configuration of water clusters on the wall surface was obtained as shown in Figure S5b.

Thus, to quantitatively characterize the microscopic contact angles of nano water droplets on different modified quartz surfaces, the water droplets adsorbed on the silica wall surface are approximately regarded as part of an ideal cylinder, as shown in Figure S5c. By geometrically analyzing the bottom surface of the cylinder in the X-Z plane, the contact angle of the oil-water-wall three-phase system can be obtained after stabilization of the adsorption configuration of the water droplet. The test results are presented in Figure S5d.

**Figure S6.**

**The mass fraction of hydrocarbons with different numbers of carbon atoms of (a) JHW05815 Oil Sample, (b) JHW07121 Oil Sample, and (c) J41 Oil Sample.**


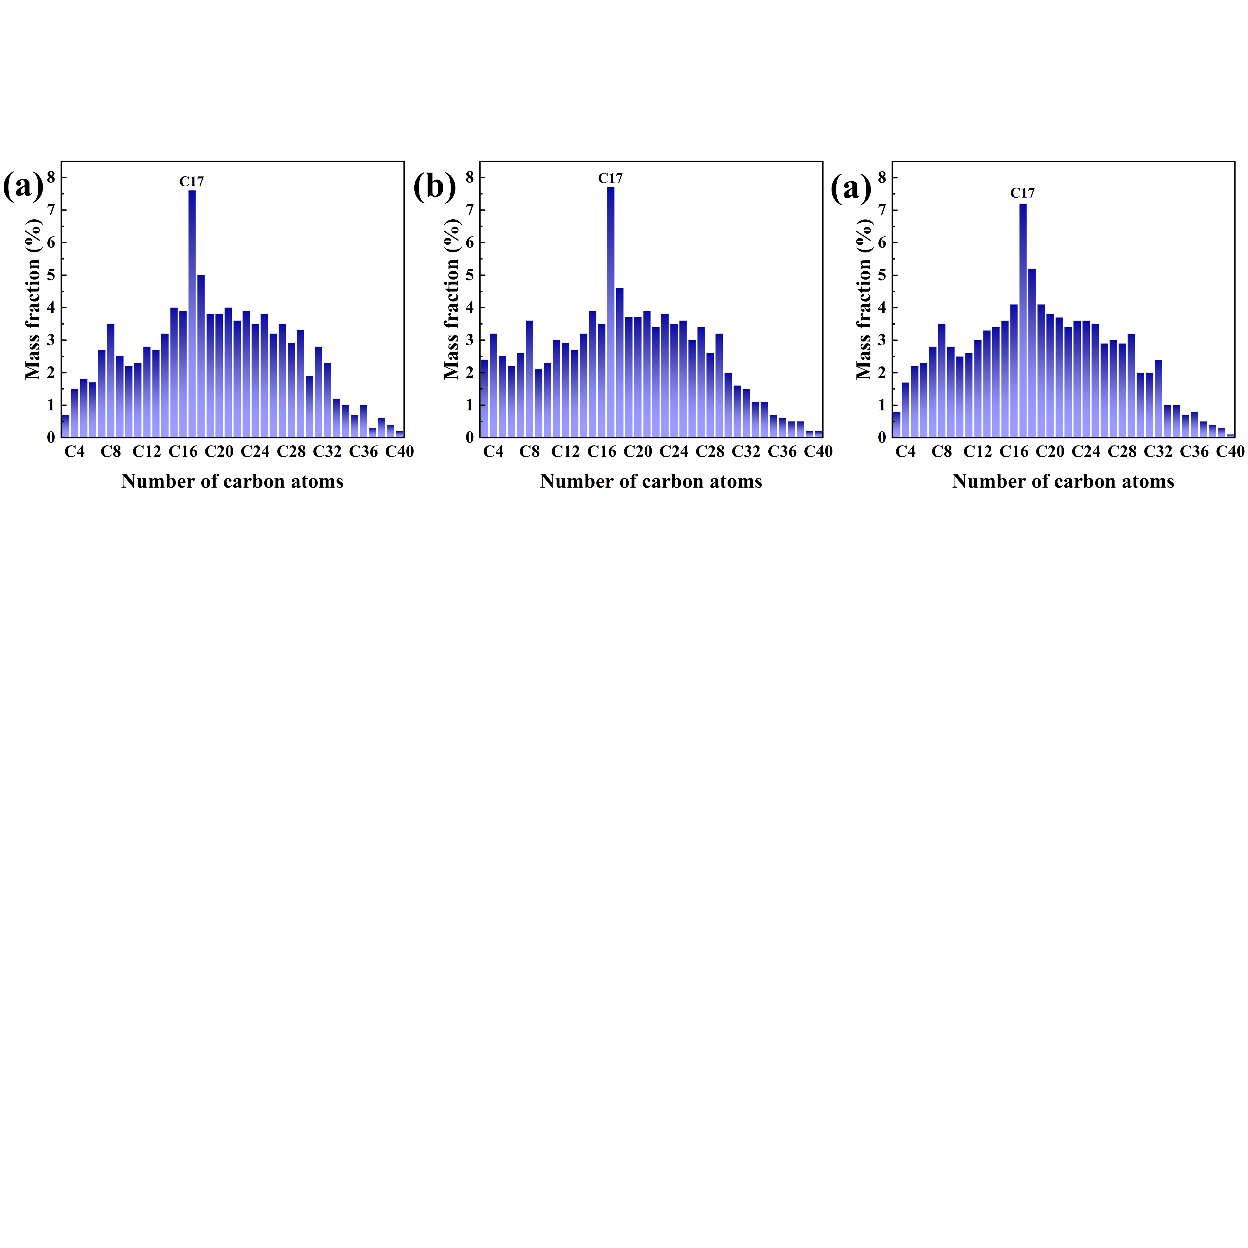


The research object of this study is the shale oil reservoirs of the Lucaogou Formation in the Jmsar Sag, Xinjiang oilfield. The reservoir has the geological characteristics of integrated source and storage, and dispersed “sweet spot”, with an average reservoir temperature of 80°C [2, 3] and an original formation pressure of about 40 MPa [4, 5]. The Luchaogou Formation (P2l) consists of upper (P2l2) and lower (P2l1) sections, each with its own “sweet spot” enrichment sections. The Xinjiang Research Institute of Petroleum Exploration and Development utilized gas chromatography-mass spectrometry (GC-MS) to analyze shale oil samples from the lower section (P2l1) of the Lugaogou Formation. Figure S6 displays the test results of the different hydrocarbon components of the J41, JHW5815, and JHW07121 oil wells, revealing that the carbon number of the hydrocarbon with the highest mass fraction in the chromatographic peak is n-C17H36.

**Table S1.**

The average mass fraction of light, heavy, and medium hydrocarbon components of the Jimsar shale oil.

|  | J41 | JHW05815 | JHW07121 | Average |
| --- | --- | --- | --- | --- |
| Light components(C3-C4) (%) | 2.6 | 5.4 | 2.3 | 3.43 |
| medium component (C5-C16) (%) | 36.1 | 34.5 | 33.3 | 34.63 |
| heavy component (C17-C40) (%) | 61.3 | 60.1 | 64.3 | 61.9 |

By averaging the data from the oil sample of three wells with different well numbers in Figure S6, the average mass fractions of light (C3-C4), medium (C5-C16), and heavy component (C17-C40) of the Jimsar shale oil were obtained as shown in Table S1 (refer to [6] for the way of dividing the light, medium and heavy components of shale oil). In this MD simulations, the light, medium, and heavy components are replaced by C4, C8, and C20, respectively.

**Table S2.**

The mole fractions and number of each component of the shale oil model

| Shale oil components | Mole fraction (%) | Number |
| --- | --- | --- |
| n-Butane(n-C4H10) | 14.28 | 110 |
| n-Octane (n-C8H18) | 50.12 | 385 |
| n-Eicosane (n-C20H42) | 35.6 | 275 |

The average mass fraction as shown in Table S1 was converted to a molar fraction to obtain the number of each hydrocarbon component of the simulated shale oil.

**References**

1. Wang, L.; Lyu, W.; Ji, Z.; Wang, L.; Liu, S.; Fang, H.; Yue, X.; Wei, S.; Liu, S.; Wang, Z., Molecular Dynamics Insight into the CO2 Flooding Mechanism in Wedge-Shaped Pores. Molecules 2022, 28, (1), 188.

2. Zhu, D.-Y.; Zhao, Y.-H.; Zhang, H.-J.; Zhao, Q.; Shi, C.-Y.; Qin, J.-H.; Su, Z.-H.; Wang, G.-Q.; Liu, Y.; Hou, J.-R., Combined imbibition system with black nanosheet and low-salinity water for improving oil recovery in tight sandstone reservoirs. Petroleum Science 2022.

3. Wei, B.; Zhang, X.; Wu, R.; Zou, P.; Gao, K.; Xu, X.; Pu, W.; Wood, C., Pore-scale monitoring of CO2 and N2 flooding processes in a tight formation under reservoir conditions using nuclear magnetic resonance (NMR): A case study. Fuel 2019, 246, 34-41.

4. Fei, W.; Yingqi, R.; Qiaoyun, C.; ZHANG, S., A pressure drop model of post-fracturing shut-in considering the effect of fracturing-fluid imbibition and oil replacement. Petroleum Exploration and Development 2021, 48, (6), 1440-1449.

5. Lu, M.; Cao, H.; Sun, W.; Yan, X.; Yang, Z.; Xu, Y.; Wang, Z.; Ouyang, M., Quantitative prediction of seismic rock physics of hybrid tight oil reservoirs of the Permian Lucaogou Formation, Junggar Basin, Northwest China. Journal of Asian Earth Sciences 2019, 178, 216-223.

6. Dong, X.; Xu, W.; Liu, H.; Chen, Z.; Lu, N.; Wang, W., On the replacement behavior of CO2 in nanopores of shale oil reservoirs: Insights from wettability tests and molecular dynamics simulations. Geoenergy Science and Engineering 2023, 223, 211528.
